# Supplementary material for: A Z-scheme visible-light-driven Ag/Ag3PO4/Bi2MoO6 photocatalyst: synthesis and enhanced photocatalytic activity
Source: Royal Society of Chemistry journal article supplement (doi:10.1039/c5ra22110b), 2015-01-01
Supplement: c5ra22110b1.pdf [file c5ra22110b1.pdf]

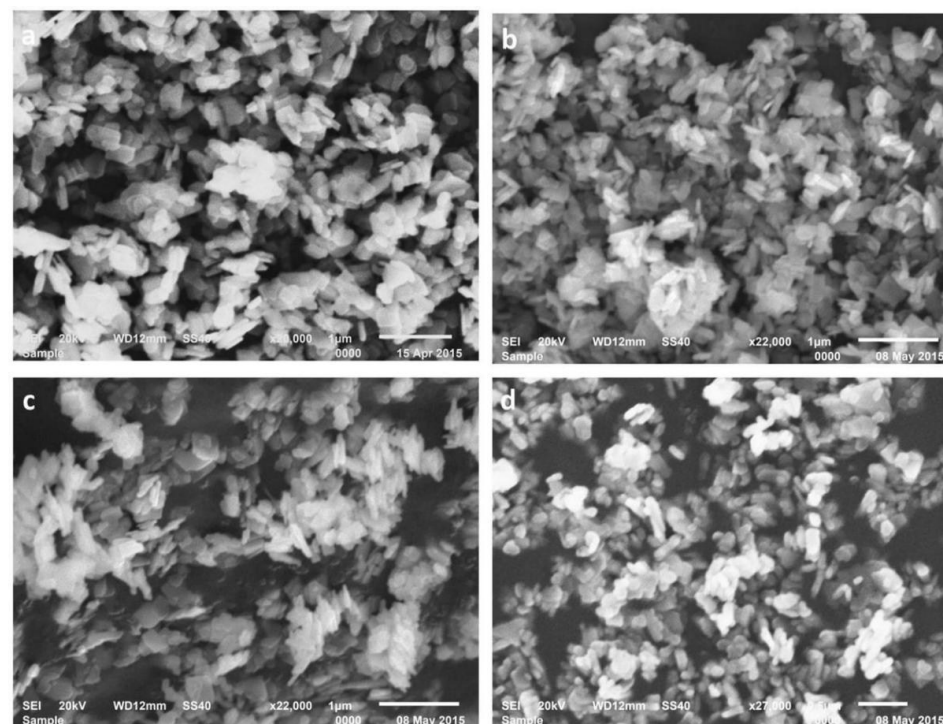

**Fig. S1** SEM images of  $\text{Bi}_2\text{MoO}_6$  (a),  $\text{Ag}/\text{Bi}_2\text{MoO}_6$  (b),  $\text{Ag}_3\text{PO}_4/\text{Bi}_2\text{MoO}_6$  (c) and  $\text{Ag}/\text{Ag}_3\text{PO}_4/\text{Bi}_2\text{MoO}_6$  (d).

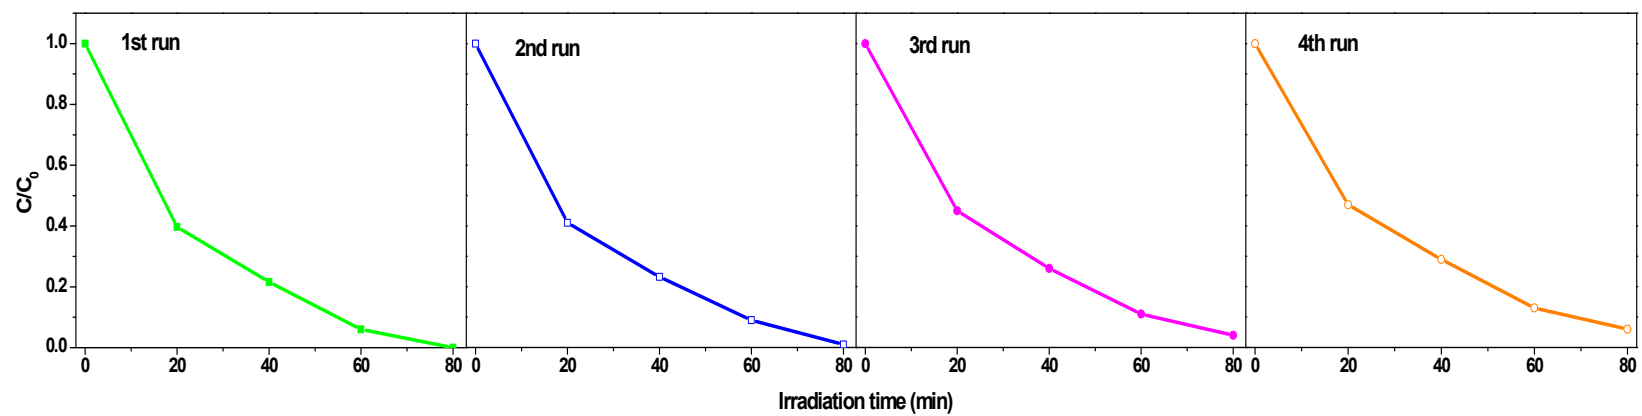

**Fig. S2** Cycling runs for the photocatalytic degradation of Rh B over the  $\text{Ag}/\text{Ag}_3\text{PO}_4/\text{Bi}_2\text{MoO}_6$  sample under visible light irradiation.
